**Title:** Ability of calculated right adrenal vein aldosterone levels to identify the aldosterone-overproducing side in patients with primary aldosteronism undergoing adrenal venous sampling.

**Running title:** Calculated right adrenal vein aldosterone

**Authors' names and affiliation:**

Lalita Tuandam, M.D.

Division of Endocrinology and Metabolism, Department of Medicine. Faculty of Medicine, Prince of Songkla University. Email: [lalita.tuandam@gmail.com](mailto:lalita.tuandam@gmail.com)

Supamai Soonthornpun, M.D.

Division of Endocrinology and Metabolism, Department of Medicine. Faculty of Medicine, Prince of Songkla University. Email: [ssupamai@hotmail.com](mailto:ssupamai@hotmail.com)

**Corresponding author:**

Supamai Soonthornpun, M.D.

Department of Medicine, Faculty of Medicine,

Prince of Songkla University,

Hat Yai, Songkhla 90110 THAILAND

Email: [ssupamai@hotmail.com](mailto:ssupamai@hotmail.com)

**Key words:** calculated right adrenal vein aldosterone, dominant side, primary aldosteronism, adrenal venous sampling.

**Word count:** 1981

## **Abstract**

**Background:** Adrenal venous sampling (AVS) is a gold standard procedure to determine the dominant side of aldosterone secretion in patients with primary aldosteronism. Unsuccessful cannulation of right adrenal vein (RAV) is a common problem in performing AVS.

**Objective:** To use calculated aldosterone concentration in the RAV ( $cAld_{RAV}$ ) for identifying the dominant side of aldosterone secretion.

**Design:** Retrospective study, 2011-2023.

**Methods:** Based on the assumption that cortisol production from both adrenal glands is equal, aldosterone concentration in the RAV was calculated by using the data from left adrenal vein (LAV) and inferior vena cava. The aldosterone concentration in the LAV ( $Ald_{LAV}$ ) compared to the  $cAld_{RAV}$  ( $Ald_{LAV}:cAld_{RAV}$  ratio) was then used to determine the dominant side of aldosterone secretion in patients with primary aldosteronism.

**Results:** Of 117 patients with successful AVS, 95 (81.2%) had concordant results between adrenal imaging and AVS study and were used as the gold standard for studying diagnostic performance. The  $Ald_{LAV}:cAld_{RAV}$  ratio with the cutoff values of  $\geq 3$  and  $\leq 0.33$  could identify unilateral diseases (left-sided and right-sided disease, respectively) with 93.8% sensitivity and 100% specificity. In 22 patients who had discordant results between adrenal imaging and standard AVS interpretation, 11 had concordant results when using the  $Ald_{LAV}:cAld_{RAV}$  ratio.

**Conclusions:** The  $Ald_{LAV}:cAld_{RAV}$  ratio can determine the dominant side of aldosterone secretion with high sensitivity and specificity. It can not only be used for patients with unsuccessful cannulation of RAV but also increase the concordance rate in those who have discordance between adrenal imaging and standard AVS interpretation.

## Introduction

Primary aldosteronism is a leading cause of secondary hypertension. Aldosterone-producing adenoma (APA) and idiopathic hyperaldosteronism (IHA) are major subtypes that account for about 95% of patients with primary aldosteronism.<sup>1</sup> Generally, APA is unilateral and IHA is bilateral disease, but this is not always true. Accurate identification of the dominant side of aldosterone secretion in patients with primary aldosteronism is an essential step because the bilateral disease needs life-long treatment with mineralocorticoid receptor antagonists, while the unilateral disease can be cured with a unilateral adrenalectomy. Despite a computed tomography being an accurate imaging tool for evaluating adrenal glands, it still has a limitation for discriminating unilateral from bilateral disease.<sup>2-4</sup> Adrenal venous sampling (AVS) is accepted as a gold standard procedure to determine the dominant side of aldosterone secretion in patients with primary aldosteronism. A common problem in performing AVS is an unsuccessful cannulation of the right adrenal vein (RAV) due to its anatomy, namely small diameter, short length and high variants. Pasternak et al. used the aldosterone:cortisol ratio in the left adrenal vein (LAV) compared to that in the inferior vena cava (IVC) (LAV/IVC index) to determine the dominant side of aldosterone secretion.<sup>5</sup> This index had a high specificity but modest sensitivity for determining unilateral disease. In addition, other studies have found that the cutoff value and diagnostic performance of this index were inconsistent.<sup>6-12</sup>

Based on the assumption that the cortisol production from both adrenal glands is equal, the aldosterone concentration in the RAV ( $Ald_{RAV}$ ) can be calculated by using the data from the LAV and the IVC. The ratio between the aldosterone concentration in the LAV ( $Ald_{LAV}$ ) and the calculated aldosterone concentration in the RAV ( $cAld_{RAV}$ ) ( $Ald_{LAV}:cAld_{RAV}$  ratio) was then used to determine the dominant side of aldosterone secretion.

## Materials and methods

This is a retrospective study of patients with confirmed or suspected primary aldosteronism who underwent AVS at Songklanagarind Hospital during the years 2011 to 2023. The study protocol was approved by the Ethics Committee of the Faculty of Medicine, Prince of Songkla University (REC.66-289-14-4). The diagnosis of primary aldosteronism was based on a saline infusion test. Confirmed diagnosis was made when plasma aldosterone concentrations at 4 h post-infusion were more than 10 ng/dL (277.4 pmol/L). The levels between 5-10 ng/dL (138.7-277.4 pmol/L) were considered as suspicious. Hypertensive patients with plasma aldosterone concentration >20 ng/dL (554.8 pmol/L), plasma renin activity <1 ug/L/h and spontaneous hypokalemia were also diagnosed as confirmed primary aldosteronism without performing saline infusion test.

Computed tomography of adrenal glands was done in all patients. The AVS with adrenocorticotrophic hormone (ACTH) stimulation was performed in patients who were willing to undergo adrenalectomy if indicated. The ACTH was infused at the rate of 50 ug/h at least 30 min before and during the AVS. The AVS was performed by interventional vascular radiologists and was considered successful if cortisol ratio between adrenal vein and IVC (selectivity index) of both sides were more than 5. The dominant side of aldosterone secretion was determined by using the difference in aldosterone:cortisol ratio between RAV and LAV (lateralization index) of 3 times or more, while bilateral disease was diagnosed when the difference was less than 3 times. In case of failed cannulation of RAV only, the AVS was still considered successful if the difference in aldosterone:cortisol ratio between LAV and IVC (contralateral suppression index) was less than 0.5 and then the right adrenal gland was considered as the dominant side.<sup>13</sup> Those with unsuccessful AVS were excluded from the study. Since it is difficult to confirm the dominant side of aldosterone secretion if the result of AVS is discordant with the adrenal

imaging study, those who had concordant results between the AVS and imaging study were therefore selected to study the accuracy of using  $cAld_{RAV}$  to identify the dominant side. Those with AVS results discordant with imaging study were subsequently analyzed for an agreement between using the  $Ald_{LAV}:cAld_{RAV}$  ratio and standard AVS interpretation.

Equation for  $cAld_{RAV}$

The  $Ald_{RAV}$  was calculated based on the assumption that the cortisol production from the right and left adrenal glands are equal. The aldosterone concentration in IVC ( $Ald_{IVC}$ ) is equal to an average of the  $Ald_{LAV}$  and the  $Ald_{RAV}$ , which is diluted by the blood flow in the IVC (dilution effect). The dilution effect was equal to cortisol concentration in the LAV ( $Cort_{LAV}$ ) divided by cortisol concentration in the IVC ( $Cort_{IVC}$ ), the so-called selectivity index of the left side. The  $Ald_{RAV}$  was then calculated according to the equations shown below.

$$Ald_{IVC} = 0.5 \times (Ald_{LAV} + Ald_{RAV}) \div \text{Dilution effect}$$

$$\text{Dilution effect} = Cort_{LAV} \div Cort_{IVC}$$

$$cAld_{RAV} = [2 \times Ald_{IVC} \times (Cort_{LAV} \div Cort_{IVC})] - Ald_{LAV}$$

When the  $cAld_{RAV}$  had a negative value, it was replaced by 100, which was the lowest value of aldosterone concentration in the non-dominant site found in our data. Finally, the dominant side of aldosterone secretion was determined by the  $Ald_{LAV}:cAld_{RAV}$  ratio. Ratios of 3 or more indicated that left adrenal gland was the dominant side. Ratios of 0.33 or less indicated that right adrenal gland was the dominant side. Ratios between 0.33 and 3 indicated bilateral disease.

Plasma aldosterone concentration and plasma renin activity were measured by radioimmunoassay (DIASource ImmunoAssays, Louvain-la-Neuve, Belgium). Serum cortisol

concentration was measured by electrochemiluminescent immunoassay (Roche Diagnostics, Mannheim, Germany)

#### Statistical analysis

The diagnostic performance was determined by the area under the receiver operating characteristic (ROC) curve, sensitivity and specificity. The scatterplot was generated by MedCalc® Statistical Software version 20.215 (MedCalc Software Ltd, Ostend, Belgium).

### Results

Of 117 patients with successful AVS, 95 (81.2%) had concordant results between AVS and adrenal imaging study. Of those with concordant results, 81 were unilateral disease (38 were left-sided and 43 were right-sided) and 14 were bilateral disease. The dominant side was determined by using the lateralization index in 80 cases and using the contralateral suppression index in 15 cases. The areas under the ROC curve of the  $\text{Aldo}_{\text{LAV}}:\text{cAldo}_{\text{RAV}}$  ratio for left-sided and right-sided diseases were 0.980 and 1.00, respectively. The scatterplot of the  $\text{Aldo}_{\text{LAV}}:\text{cAldo}_{\text{RAV}}$  ratio in those with unilateral and bilateral disease is shown in Figure 1A. The cutoff values of  $\geq 3$  and  $\leq 0.33$  could identify the left-sided and the right-sided disease, respectively, with 93.8% sensitivity and 100% specificity. Likewise, the cutoff values between 3-0.33 could identify bilateral disease with 100% sensitivity and 93.8% specificity. Only 5 patients (5.3%) had the  $\text{Aldo}_{\text{LAV}}:\text{cAldo}_{\text{RAV}}$  ratio discordant with the standard AVS interpretation. Figure 1B shows the scatterplot of the LAV/IVC index in the unilateral and bilateral disease. When using the LAV/IVC index with the cutoff values of  $\geq 5.5$  and  $\leq 0.5$  originally proposed by Pasternak et al., the sensitivity and specificity for diagnosis of the unilateral disease were 63.0% and 92.9%, respectively. In other words, the cutoff values between 0.5-5.5 for diagnosis of bilateral disease had 92.9% sensitivity and 63.0% specificity. Since the area under the ROC curve of the

LAV/IVC index for left-sided and right-sided disease was also high (0.968 and 1.00, respectively), we identified the optimal cutoff values derived from our data as  $\geq 1.5$  and  $\leq 0.6$ , which yielded a 93.8% sensitivity and 92.9% specificity for the diagnosis of unilateral disease.

Among the 22 patients who had discordant results between adrenal imaging and standard AVS interpretation, 20 were interpreted as the dominant side by using the lateralization index and 2 cases were interpreted using the contralateral suppression index. When using the  $\text{Ald}_{\text{LAV}}:\text{cAld}_{\text{RAV}}$  ratio in these patients, the results were changed to concordance in 11 patients and the remaining half had the same results as the standard AVS interpretation (Table 1).

## **Discussion**

This is the first study that calculated the aldosterone concentration in the RAV by using a simple equation based on the assumption that each adrenal gland produces an equal amount of cortisol and used the  $\text{Ald}_{\text{LAV}}:\text{cAld}_{\text{RAV}}$  ratio to identify the dominant side of aldosterone secretion in patients with confirmed or suspected primary aldosteronism. The  $\text{Ald}_{\text{LAV}}:\text{cAld}_{\text{RAV}}$  ratio can diagnose unilateral and bilateral disease with high sensitivity and specificity comparable with the standard AVS interpretation using lateralization and contralateral suppression indices. This ratio also increased the concordance rate with imaging study in the patients who had discordant results when using the standard AVS interpretation.

The dilution effect in the equation was derived based on the assumption that each adrenal gland produces an equal amount of cortisol. If the cortisol production from the left adrenal gland was lower, the dilution effect was underestimated. On the contrary, if the cortisol production from the left adrenal gland was higher, the dilution effect was overestimated. Of 38 patients with left-sided disease, 5 had  $\text{Ald}_{\text{LAV}}:\text{cAld}_{\text{RAV}}$  ratio less than 3. Theoretically, the falsely low  $\text{Ald}_{\text{LAV}}:\text{cAld}_{\text{RAV}}$  ratio is most likely caused by overestimation of the dilution effect. However,

as the cortisol concentrations in right and left adrenal veins in these patients were quite similar, the overestimation of the dilution effect could not explain the low  $\text{Ald}_{\text{LAV}}:\text{cAld}_{\text{RAV}}$  ratio in these patients. An error in collecting blood samples and/or measuring aldosterone in the IVC may be another possible explanation for the falsely low  $\text{Ald}_{\text{LAV}}:\text{cAld}_{\text{RAV}}$  ratio. The high sensitivity and specificity of the  $\text{Ald}_{\text{LAV}}:\text{cAld}_{\text{RAV}}$  ratio for identifying the dominant side found in this study implies that the assumption of equal cortisol production from each adrenal gland is appropriate.

Apart from difficult cannulation and collection of blood samples, anatomical variants are also commonly found in the RAV.<sup>14,15</sup> These could alter the AVS interpretation and mislead the results. On the other hand, LAV and IVC are easy to cannulate and draw blood. By using  $\text{cAld}_{\text{RAV}}$  derived from the data obtained from LAV and IVC in this study, the discordance rate was reduced to 50% among those in whom standard AVS interpretation was discordant with imaging study, whereas the concordance rate was still very high (94.7%) in those who had concordant results between standard AVS interpretation and imaging study. This is one of the advantages of using the  $\text{cAld}_{\text{RAV}}$  for dominant side determination in addition to those with unsuccessful cannulation of RAV.

Pasternak et al. originally used the LAV/IVC index to predict the dominant side of aldosterone secretion and found that the cutoff values of the LAV/IVC index of  $\geq 5.5$  and  $\leq 0.5$  predicted unilateral disease with 63% sensitivity and 100% specificity.<sup>5</sup> These findings were similar to this study. However, when using the optimal cutoff values derived from our data of  $\geq 1.5$  and  $\leq 0.6$ , it was found that the LAV/IVC index had a similar diagnostic performance to the  $\text{Ald}_{\text{LAV}}:\text{cAld}_{\text{RAV}}$  ratio. An inconsistent cutoff value of the LAV/IVC index was also found in other studies.<sup>8-11</sup> The cutoff values of the  $\text{Ald}_{\text{LAV}}:\text{cAld}_{\text{RAV}}$  ratio of  $\geq 3$  and  $\leq 0.33$  means that



left-sided disease is indicated when the  $Aldo_{LAV}$  is at least 3 times higher than the  $cAldo_{RAV}$ .

Conversely, right-sided disease is indicated when the  $Aldo_{LAV}$  is at least 3 times lower than the  $cAldo_{RAV}$ . These cutoff values correspond with the criteria for a lateralization index of  $\geq 3$  used in this study. This is another advantage of using the  $Aldo_{LAV}:cAldo_{RAV}$  ratio for dominant side determination.

There were some limitations in this study. First, the number of patients who had bilateral disease was small when compared to those with unilateral disease. The low number of bilateral disease in this study may be from a low sensitivity of saline infusion test to detect IHA.<sup>16</sup> Second, the patients with discordant results between imaging and AVS study were treated with medications; the final diagnoses were therefore inconclusive. This is the reason why only those with concordant results were selected for analysis of diagnostic performance. Finally, it is the first time that the  $Aldo_{LAV}:cAldo_{RAV}$  ratio has been proposed; validation studies are warranted to confirm the consistency of the cutoff values and results.

In conclusion, the  $Aldo_{LAV}:cAldo_{RAV}$  ratio can determine the dominant side of aldosterone secretion with high sensitivity and specificity. It can not only be used for patients with unsuccessful cannulation of RAV but also increase the concordance rate in those who have discordance between adrenal imaging and standard AVS interpretation.

**Conflict of Interest:** All authors declare no conflicts of interest.

**Funding:** This work did not receive any specific grant from any funding agency in the public, commercial, or not-for-profit sector.

**Acknowledgments:** We are very grateful to Alan F. Geater for proofreading the manuscript.

**Author Contributions:** LT collected and analyzed the data and wrote the manuscript. SS designed the study, analyzed the data, and wrote the manuscript. All authors reviewed and edited the manuscript and approved the final version of the manuscript.

**Data Availability statement:** The data are available from the corresponding author on reasonable request.

## References

1. Fagugli RM, Taglioni C. Changes in the perceived epidemiology of primary hyperaldosteronism. *Int J Hypertens*. 2011;2011:162804.
2. Ceral J, Solar M, Krajina A, Ballon M, Suba P, Cap J. Adrenal venous sampling in primary aldosteronism: a low dilution of adrenal venous blood is crucial for a correct interpretation of the results. *Eur J Endocrinol*. 2010;162(1):101-107.
3. Kempers MJ, Lenders JW, van Outheusden L, van der Wilt GJ, Schultze Kool LJ, Hermus AR, Deinum J. Systematic review: diagnostic procedures to differentiate unilateral from bilateral adrenal abnormality in primary aldosteronism. *Ann Intern Med*. 2009;151(5):329-337.
4. Nanba AT, Nanba K, Byrd JB, Shields JJ, Giordano TJ, Miller BS, Rainey WE, Auchus RJ, Turcu AF. Discordance between imaging and immunohistochemistry in unilateral primary aldosteronism. *Clin Endocrinol (Oxf)*. 2017;87(6):665-672.
5. Pasternak JD, Epelboym I, Seiser N, Wingo M, Herman M, Cowan V, Gosnell JE, Shen WT, Kerlan RK Jr, Lee JA, Duh QY, Suh I. Diagnostic utility of data from adrenal venous sampling for primary aldosteronism despite failed cannulation of the right adrenal vein. *Surgery*. 2016;159(1):267-273.

6. Wang TS, Kline G, Yen TW, Yin Z, Liu Y, Rilling W, So B, Findling JW, Evans DB, Pasiaka JL. A multi-institutional comparison of adrenal venous sampling in patients with primary aldosteronism: caution advised if successful bilateral adrenal vein sampling is not achieved. *World J Surg*. 2018;42(2):466-472.
7. Strajina V, Al-Hilli Z, Andrews JC, Bancos I, Thompson GB, Farley DR, Lyden ML, Dy BM, Young WF, McKenzie TJ. Primary aldosteronism: making sense of partial data sets from failed adrenal venous sampling-suppression of adrenal aldosterone production can be used in clinical decision making. *Surgery*. 2018;163(4):801-806.
8. Lin L, Zhou L, Guo Y, Liu Z, Chen T, Liu Z, Wang K, Li J, Zhu Y, Ren Y. Can incomplete adrenal venous sampling data be used in predicting the subtype of primary aldosteronism? *Ann Endocrinol (Paris)*. 2019;80(5-6):301-307.
9. Suntornlohanakul O, Soonthornpun S, Srisintorn W, Murray RD, Kietsiroje N. Performance of the unilateral AV/IVC index in primary hyperaldosteronism subtype prediction: A validation study in a single tertiary centre. *Clin Endocrinol (Oxf)*. 2020;93(2):111-118.
10. Lee SE, Park SW, Choi MS, Kim G, Yoo JH, Ahn J, Jun JE, Park HS, Hyun D, Cho SK, Ko SE, Kim BJ, Kim JW, Yoon HK, Koh JM, Lee SH, Kim JH. Primary aldosteronism subtyping in the setting of partially successful adrenal vein sampling. *Ther Adv Endocrinol Metab*. 2021;12:2042018821989239.
11. Kocjan T, Vidmar G, Vrckovnik R, Stankovic M. Limited diagnostic utility of partially successful adrenal vein sampling for primary aldosteronism subtyping. *Endokrynol Pol*. 2021;72(4):293-300.

12. O'Malley KJ, Alnablsi MW, Xi Y, Pathak M, Khan F, Pillai AK, Kathuria MK, Vongpatanasin W. Diagnostic performance of the adrenal vein to inferior vena cava aldosterone ratio in classifying the subtype of primary aldosteronism. *Hypertens Res.* 2023;46:2535–2542.
13. Kline GA, Chin A, So B, Harvey A, Pasiaka JL. Defining contralateral adrenal suppression in primary aldosteronism: implications for diagnosis and outcome. *Clin Endocrinol (Oxf)*. 2015;83(1):20-27.
14. Scholten A, Cisco RM, Vriens MR, Shen WT, Duh QY. Variant adrenal venous anatomy in 546 laparoscopic adrenalectomies. *JAMA Surg.* 2013;148(4):378-383.
15. Omura K, Ota H, Takahashi Y, Matsuura T, Seiji K, Arai Y, Morimoto R, Satoh F, Takase K. Anatomical variations of the right adrenal vein: concordance between multidetector computed tomography and catheter venography. *Hypertension.* 2017;69(3):428-434.
16. Schirpenbach C, Seiler L, Maser-Gluth C, Rüdiger F, Nickel C, Beuschlein F, Reincke M. Confirmatory testing in normokalaemic primary aldosteronism: the value of the saline infusion test and urinary aldosterone metabolites. *Eur J Endocrinol.* 2006;154(6):865-873.

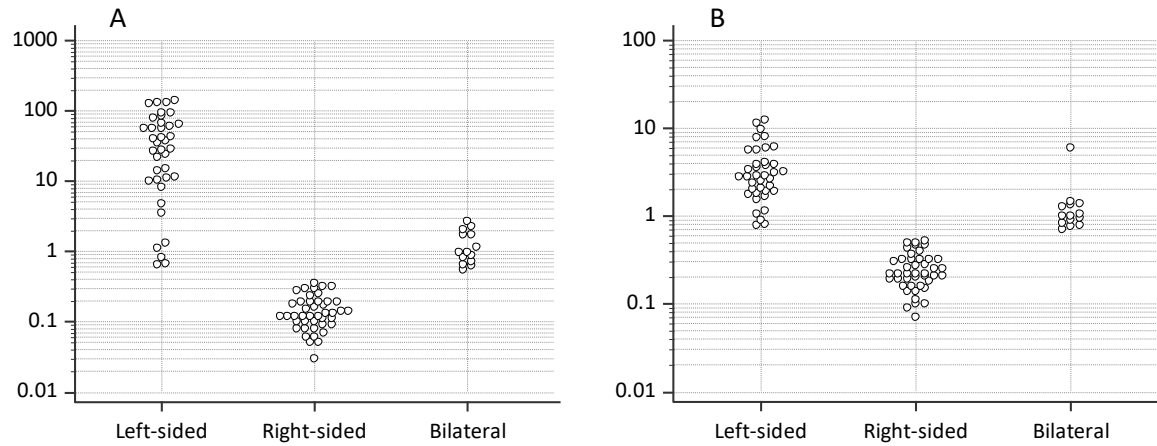

**Figure 1.** Logarithmic-scale scatterplot of the Ald<sub>LAV</sub>:cAld<sub>RAV</sub> ratio (A) and the LAV/IVC index (B) according to the dominant side of aldosterone secretion.

**Table 1.** The number of concordant and discordant pairs of adrenal imaging and AVS study using Ald<sub>LAV</sub>:cAld<sub>RAV</sub> ratio in the 22 patients who had discordant results using standard AVS interpretation.

|               |             | Standard AVS interpretation |           |            | Ald <sub>LAV</sub> :cAld <sub>RAV</sub> ratio |           |            |
|---------------|-------------|-----------------------------|-----------|------------|-----------------------------------------------|-----------|------------|
|               |             | Right-sided                 | Bilateral | Left-sided | Right-sided                                   | Bilateral | Left-sided |
| Imaging study | Right-sided | 0                           | 6         | 1          | 5                                             | 1         | 1          |
|               | Bilateral   | 1                           | 0         | 0          | 0                                             | 1         | 0          |
|               | Left-sided  | 2                           | 10        | 0          | 2                                             | 5         | 5          |
|               | Normal      | 1                           | 0         | 1          | 1                                             | 0         | 1          |
